# Supplementary material for: Time Course of Redox Biomarkers in COVID-19 Pneumonia: Relation with Inflammatory, Multiorgan Impairment Biomarkers and CT Findings
Source: MDPI journal article supplement (doi:10.3390/antiox10071126), 2021-07-14
Supplement: s1 [file s1]

# Supplementary Material: Time Course of Redox Biomarkers in COVID-19 Pneumonia: Relation with Inflammatory, Multiorgan Impairment Biomarkers and CT Findings

Tijana Kosanovic <sup>1</sup>, Dragan Sagic <sup>2</sup>, Vladimir Djukic <sup>1</sup>, Marija Pljesa-Ercegovac <sup>3</sup>, Ana Savic-Radojevic <sup>3</sup>, Zoran Bukumiric <sup>4</sup>, Miodrag Lalosevic <sup>1</sup>, Marjana Djordjevic <sup>1</sup>, Vesna Coric <sup>3,\*</sup> and Tatjana Simic <sup>3,5,\*</sup>

<sup>1</sup> Radiology Department, The University Hospital 'Dr. Dragisa Misovic- Dedinje', 11000 Belgrade, Serbia; tijana.kosanovic@dragisamisovic.bg.ac.rs (T.K.); office@dragisamisovic.bg.ac.rs (V.D.); miodrag.lalosevic@dragisamisovic.bg.ac.rs (M.L.); marjana.djordjevic@dragisamisovic.bg.ac.rs (M.D.)

<sup>2</sup> Institute for Cardiovascular Diseases "Dedinje", 11000 Belgrade, Serbia; dragan.sagic@med.bg.ac.rs (D.S.)

<sup>3</sup> Institute of medical and clinical biochemistry, Faculty of Medicine, University of Belgrade, 11000 Belgrade, Serbia; marija.pljesa-ercegovac@med.bg.ac.rs (M.P.-E.); ana.savic-radojevic@med.bg.ac.rs (A.S.R.)

<sup>4</sup> Institute of Medical Statistics and Informatics, University of Belgrade, School of Medicine, 11000 Belgrade, Serbia; zoran.bukumiric@med.bg.ac.rs (Z.B.)

<sup>5</sup> Serbian Academy of Science and Arts, 11000 Belgrade, Serbia

\* Correspondence: vesna.coric@med.bg.ac.rs (V.C.); tatjana.simic@med.bg.ac.rs (T.S.); Tel.: +381-113643273 (V.C.); +381-113643250 (T.S.)

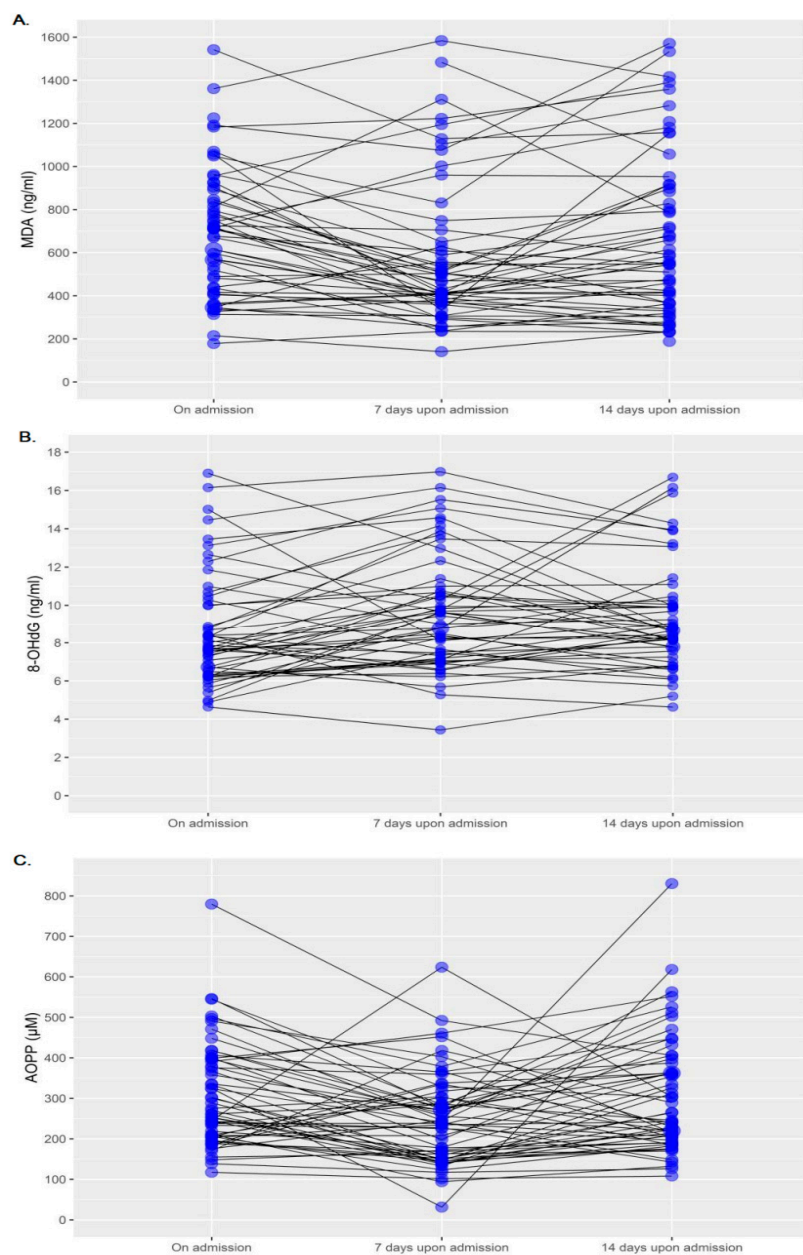

**Figure S1.** The temporal profiles of redox biomarkers **(a)** MDA, **(b)** 8-OHdG, **(c)** AOPP for each individual patient with COVID-19 pneumonia; MDA – malondialdehyde; 8-OHdG - 8-hydroxy-2'-deoxyguanosine; AOPP- Advanced oxidation protein products

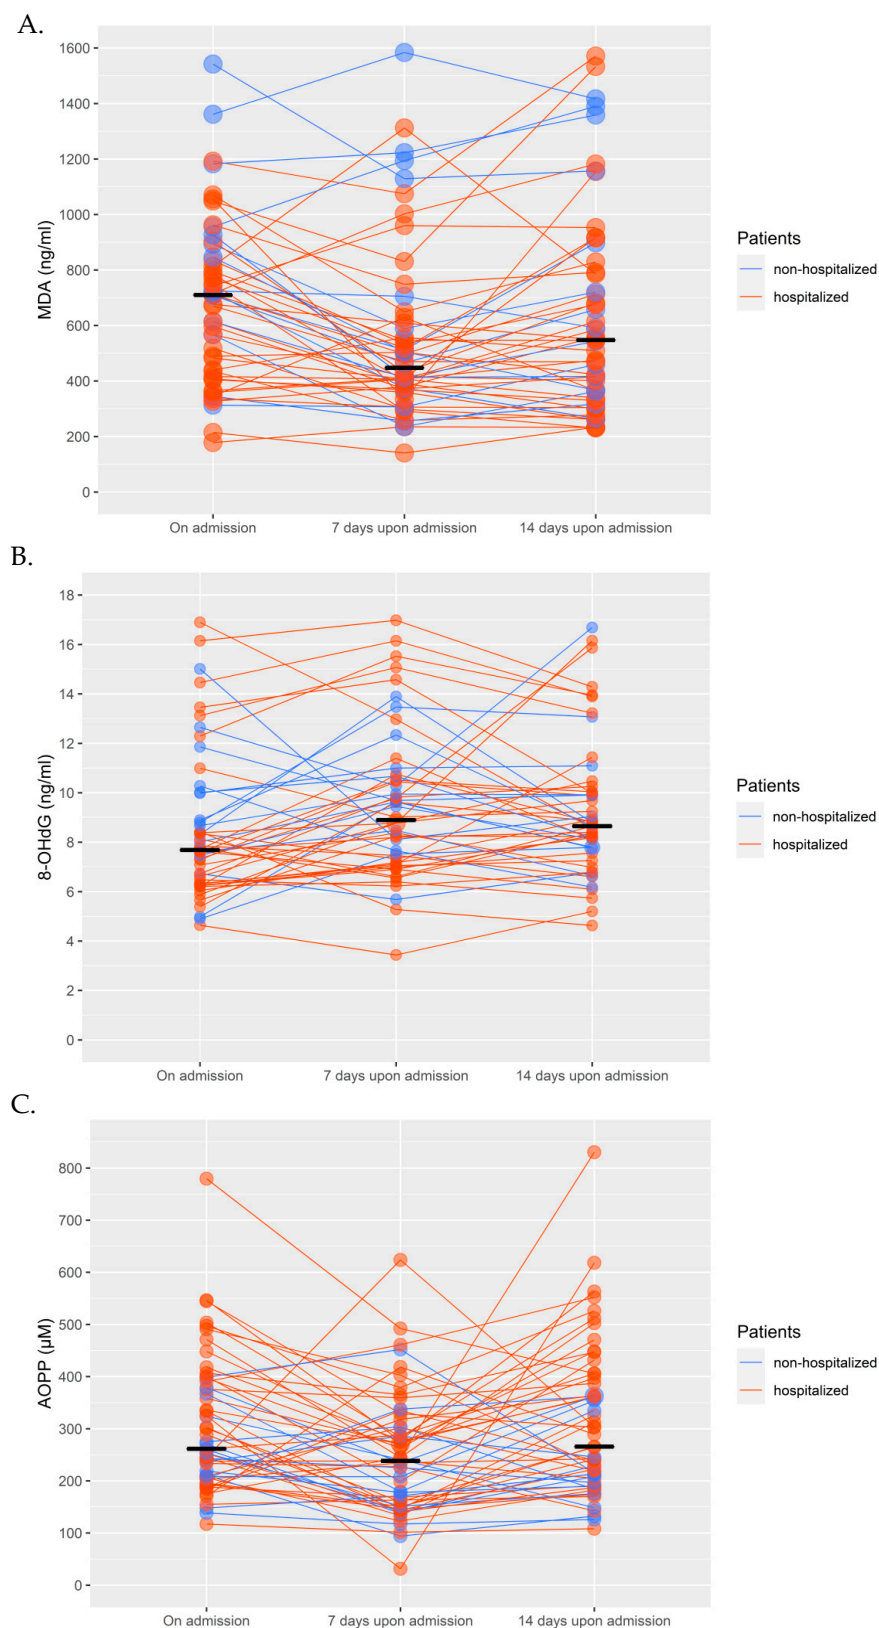

**Figure S2:** The temporal profiles of redox biomarkers (a) MDA, (b) 8-OHdG, (c) AOPP for each hospitalized patient (red) and non-hospitalized patient (blue) with COVID-19 pneumonia; MDA – malondialdehyde; 8-OHdG - 8-hydroxy-2'-deoxyguanosine;

AOPP- Advanced oxidation protein products

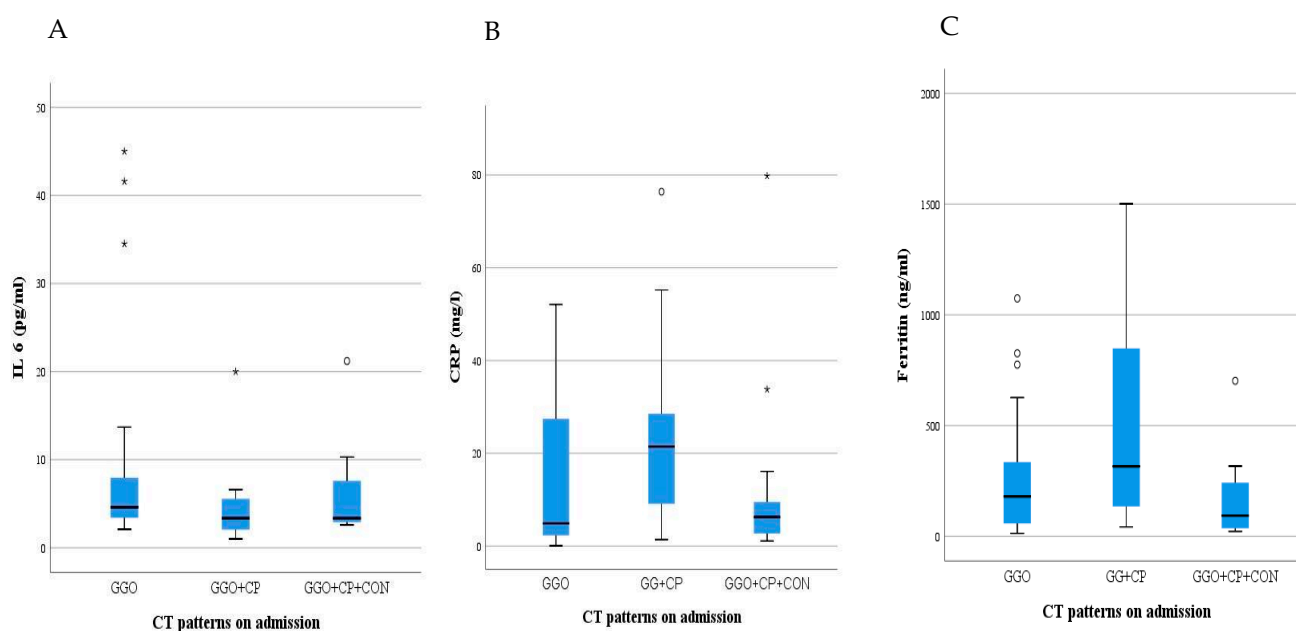

**Figure S3.** Time course of inflammatory parameters (a) IL-6, (b) CRP, (c) Ferritin in relation to CT patterns on admission; GGO-Ground Glass Opacities; CP-Crazy Paving; CON-Consolidation;

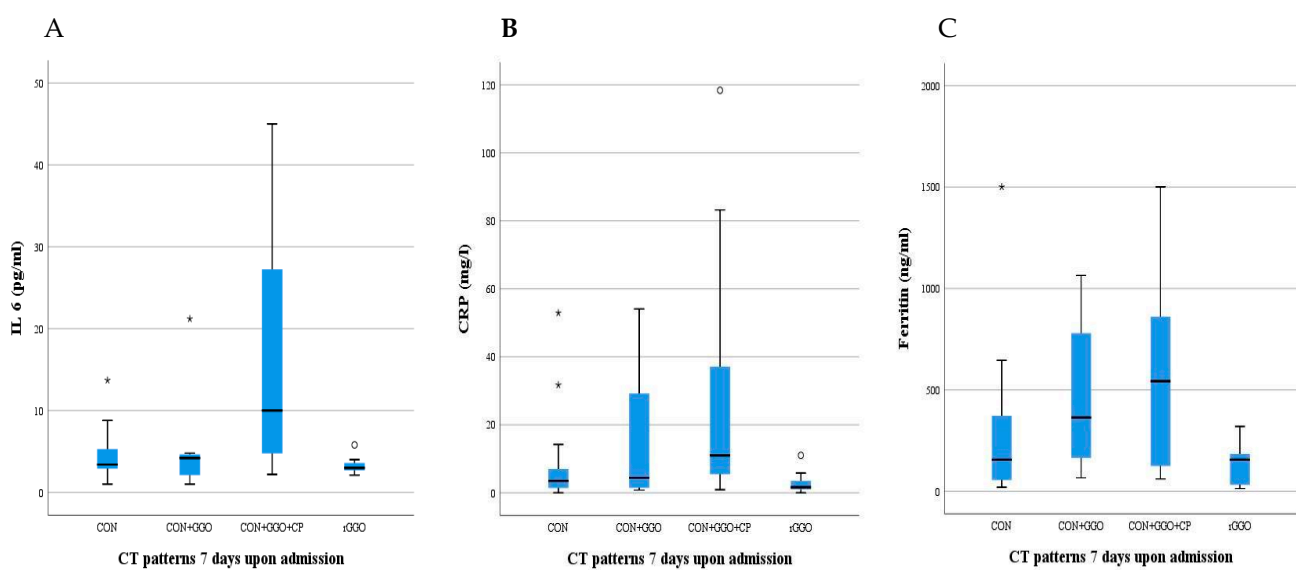

**Figure S4.** Time course of inflammatory parameters (a) IL-6, (b) CRP, (c) Ferritin in relation to CT patterns 7 days upon admission; GGO-Ground Glass Opacities; CP-Crazy Paving; CON-Consolidation; rGGO- residual Ground Glass Opacities;

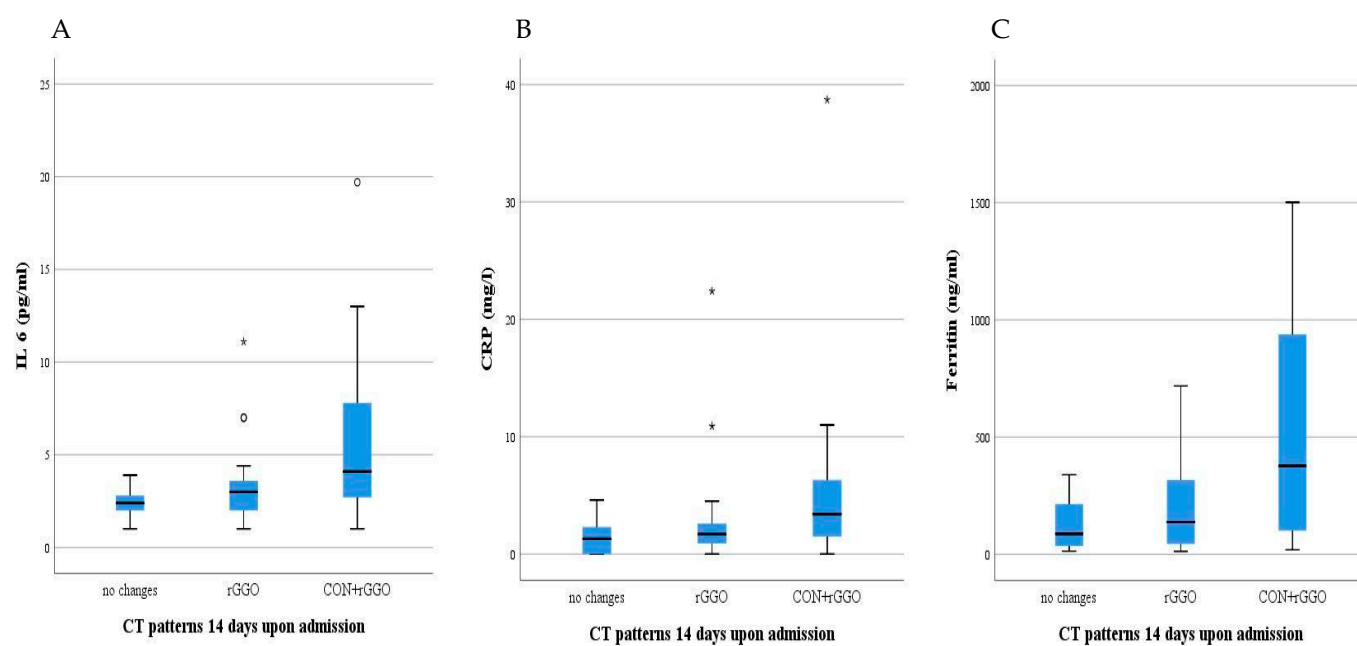

**Figure S5.** Time course of inflammatory parameters (a) IL-6, (b) CRP, (c) Ferritin in relation to CT patterns 14 days upon admission; CON-Consolidation; rGGO- residual Ground Glass Opacities;

**Table S1.** Overview of the inflammatory parameters, multiorgan impairment biomarkers and redox biomarkers in 42 hospitalized patients with COVID-19 pneumonia, on admission, 7 and 14 days upon admission.

| Laboratory parameters                   | On admission         | 7 days upon admission | 14 days upon admission | P value |
|-----------------------------------------|----------------------|-----------------------|------------------------|---------|
| <b>Inflammatory parameters</b>          |                      |                       |                        |         |
| WBC (n)                                 | 5.2±1.9              | 6.1±1.9               | 6.9±2.1                | <0.001  |
| Neutrophils (n)                         | 3.2±1.8              | 3.6±1.9               | 4.0±1.8                | 0.018   |
| Lymphocytes (n)                         | 1.4±0.4              | 1.7±0.6               | 2.0±0.6                | <0.001  |
| Monocytes(n)                            | 0.5±0.2              | 0.5±0.2               | 0.6±0.2                | <0.001  |
| NLR                                     | 2.3 (0.4-8.9)        | 1.7 (0.8-24.6)        | 1.9 (0.5-8.5)          | 0.395   |
| IL-6 (pg/ml)                            | 11.1 (2.1-112.0)     | 4.5 (1.0-45.0)        | 3.1 (1.0-41.0)         | <0.001  |
| CRP (mg/l)                              | 15.5 (1.1-79.8)      | 5.2 (0-83.2)          | 2.3 (0-38.7)           | <0.001  |
| Ferritin (ng/ml)                        |                      |                       |                        |         |
| Female                                  | 89.0 (13.0-1005.9)   | 124.5 (20.0-612.0)    | 87.5 (12.0-536.0)      | 0.030   |
| Male                                    | 378.0 (136.0-1500.9) | 617.5 (218.0-1500.9)  | 531.0 (103.0-1500.9)   | 0.001   |
| <b>Multiorgan impairment biomarkers</b> |                      |                       |                        |         |
| Urea (mmol/L)                           | 4.7±1.8              | 4.5±2.7               | 5.6±3.0                | <0.001  |
| Creatinine (µmol/L)                     | 86.4±22.7            | 78.0±16.4             | 84.8±17.2              | 0.004   |
| ALT (U/L)                               | 33.5 (17-165)        | 66.5 (20-518)         | 61 (20-253)            | <0.001  |
| AST (U/L)                               | 25 (13-95)           | 42 (15-310)           | 29.5 (11-141)          | 0.001   |
| LDH (U/L)                               | 198.5 (120-473)      | 199 (129-581)         | 180 (91-411)           | 0.007   |
| CK (U/L)                                | 70 (12-180)          | 52 (15-809)           | 52 (19-518)            | 0.136   |
| <b>Redox biomarkers</b>                 |                      |                       |                        |         |
| MDA (ng/ml)                             | 614.2 (178.4-1191.8) | 416.7 (140.6-1311.6)  | 546.6 (230.6-1570.9)   | 0.057   |
| 8-OHdG (ng/ml)                          | 7.5 (4.6-16.9)       | 8.6 (3.4-16.9)        | 8.7 (4.6-16.1)         | 0.013   |
| AOPP (µM)                               | 301.7 (117.3-779.7)  | 259.3 (31.3-623.8)    | 307.8 (108.2-830.3)    | 0.001   |

WBC- white blood cells; NLR- neutrophil-lymphocytes ratio; CRP- C reactive protein; ALT- alanine aminotransferase; AST- aspartate aminotransferase; LDH- lactate dehydrogenase; CK- creatine kinase; MDA – malondialdehyde; 8-OHdG - 8-hydroxy-2'-deoxyguanosine; AOPP- Advanced oxidation protein products; Depending on the type of variables and the normality of the distribution, results was presented median (range) or mean± standard deviation. p for ANOVA with repeated measures or Friedman test;

**Table S2.** Overview of the inflammatory parameters, multiorgan impairment biomarkers and redox biomarkers in 16 non-hospitalized patients with COVID-19 pneumonia, on admission, 7 and 14 days upon admission.

| Laboratory parameters                   | On admission         | 7 days upon admission | 14 days upon admission | P value |
|-----------------------------------------|----------------------|-----------------------|------------------------|---------|
| <b>Inflammatory parameters</b>          |                      |                       |                        |         |
| WBC (n)                                 | 4.7±1.3              | 6.1±1.9               | 5.7±1.5                | 0.047   |
| Neutrophils (n)                         | 2.6±0.9              | 3.5±1.6               | 3.3±1.2                | 0.028   |
| Lymphocytes (n)                         | 1.5±0.5              | 1.9±0.5               | 1.8±0.5                | 0.024   |
| Monocytes(n)                            | 0.4±0.2              | 0.5±0.1               | 0.5±0.1                | 0.222   |
| NLR                                     | 1.8 (0.4-3.1)        | 1.9 (0.8-3.7)         | 1.9 (0.6-3.1)          | 0.305   |
| IL-6 (pg/ml)                            | 3.5 (1.0-22.8)       | 2.9 (1.0-5.8)         | 2.4 (1.0-7.0)          | 0.043   |
| CRP (mg/l)                              | 2.9 (0.1-52.1)       | 1.5 (0-11.0)          | 1.1 (0-10.9)           | 0.004   |
| Ferritin (ng/ml)                        |                      |                       |                        |         |
| Female                                  | 39.0 (17.0-242.0)    | 34.0 (13.0-184.0)     | 38.0 (17.0-150.0)      | 0.255   |
| Male                                    | 285.5 (221.0-775.0)  | 295.0 (156.0-646.0)   | 308.5 (137.0-491.0)    | 0.223   |
| <b>Multiorgan impairment biomarkers</b> |                      |                       |                        |         |
| Urea (mmol/L)                           | 4.1±1.1              | 4.5±1.2               | 4.6±1.3                | 0.345   |
| Creatinine (μmol/L)                     | 82±16.9              | 80.9±15.5             | 80.9±15.9              | 0.834   |
| ALT (U/L)                               | 32 (22-66)           | 42.5 (19-81)          | 38 (17-123)            | 0.984   |
| AST (U/L)                               | 20 (11-38)           | 24 (11-47)            | 22.5 (10-61)           | 0.713   |
| LDH (U/L)                               | 176.5 (99-306)       | 160.5 (86-232)        | 158 (96-208)           | 0.021   |
| CK (U/L)                                | 64.5 (25-565)        | 47 (29-599)           | 54.5 (39-474)          | 0.611   |
| <b>Redox biomarkers</b>                 |                      |                       |                        |         |
| MDA (ng/ml)                             | 724.9 (312.9-1542.2) | 504.9 (235.8-1583.6)  | 591.3 (265.8-1416.7)   | 0.022   |
| 8-OHdG (ng/ml)                          | 8.7 (4.9-15.0)       | 9.7 (5.7-13.9)        | 8.4 (6.2-16.7)         | 0.269   |
| AOPP (μM)                               | 248.1 (138.6-398.8)  | 193.6 (94.2-452.0)    | 210.8 (125.9-362.2)    | 0.068   |

WBC- white blood cells; NLR- neutrophil-lymphocytes ratio; CRP- C reactive protein; ALT- alanine aminotransferase; AST- aspartate aminotransferase; LDH- lactate dehydrogenase; CK- creatine kinase; MDA – malondialdehyde; 8-OHdG - 8-hydroxy-2'-deoxyguanosine; AOPP- Advanced oxidation protein products; Depending on the type of variables and the normality of the distribution, results was presented median (range) or mean± standard deviation. p for ANOVA with repeated measures or Friedman test;
